# Supplementary material
Source: PubMed Central journal article supplement (PMC7675559)
Supplement: JGS-68-2735-s001.pdf [file JGS-68-2735-s001.pdf]

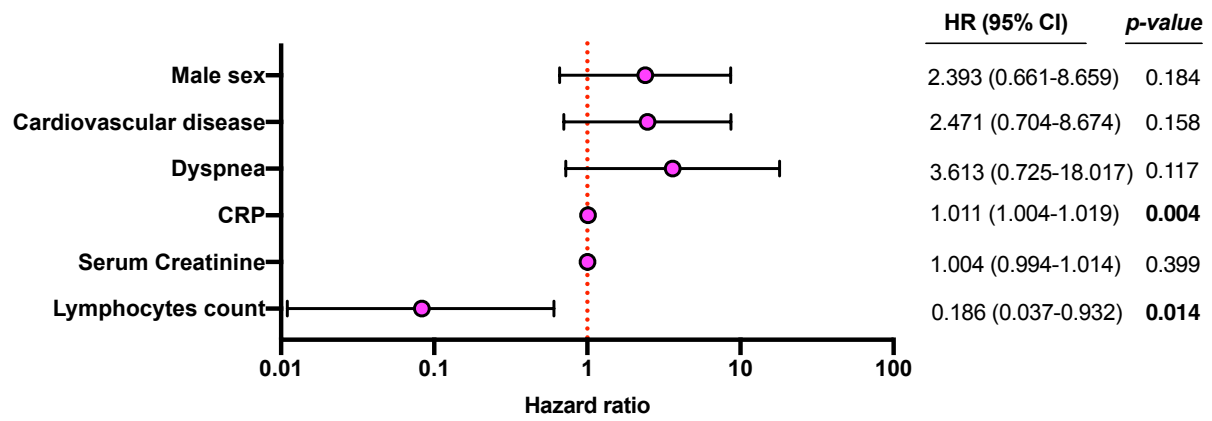

Supplementary Figure S1- Cox proportionnal hazard model analysis for predictive factors of death at 21 days in community-acquired COVID-19

n= 60 patients

Desaturation was excluded from the analysis due to low effectiveness. HR: adjusted hazard ratio. CI= Confidence Interval. *p*-value < 0.05 indicates significance.
